# Supplementary material for: Glycosyltransferase FvCpsA Regulates Fumonisin Biosynthesis and Virulence in Fusarium verticillioides
Source: MDPI journal article supplement (doi:10.3390/toxins13100718), 2021-10-11
Supplement: s1 [file s1]

# Supplementary Materials: Glycosyltransferase FvCpsA Regulates Fumonisin Biosynthesis and Virulence in *Fusarium verticillioides*

Qi Deng<sup>1</sup>, Hanxiang Wu<sup>1</sup>, Qin Gu<sup>2</sup>, Guangfei Tang<sup>1</sup> \* and Wende Liu<sup>1</sup> \*

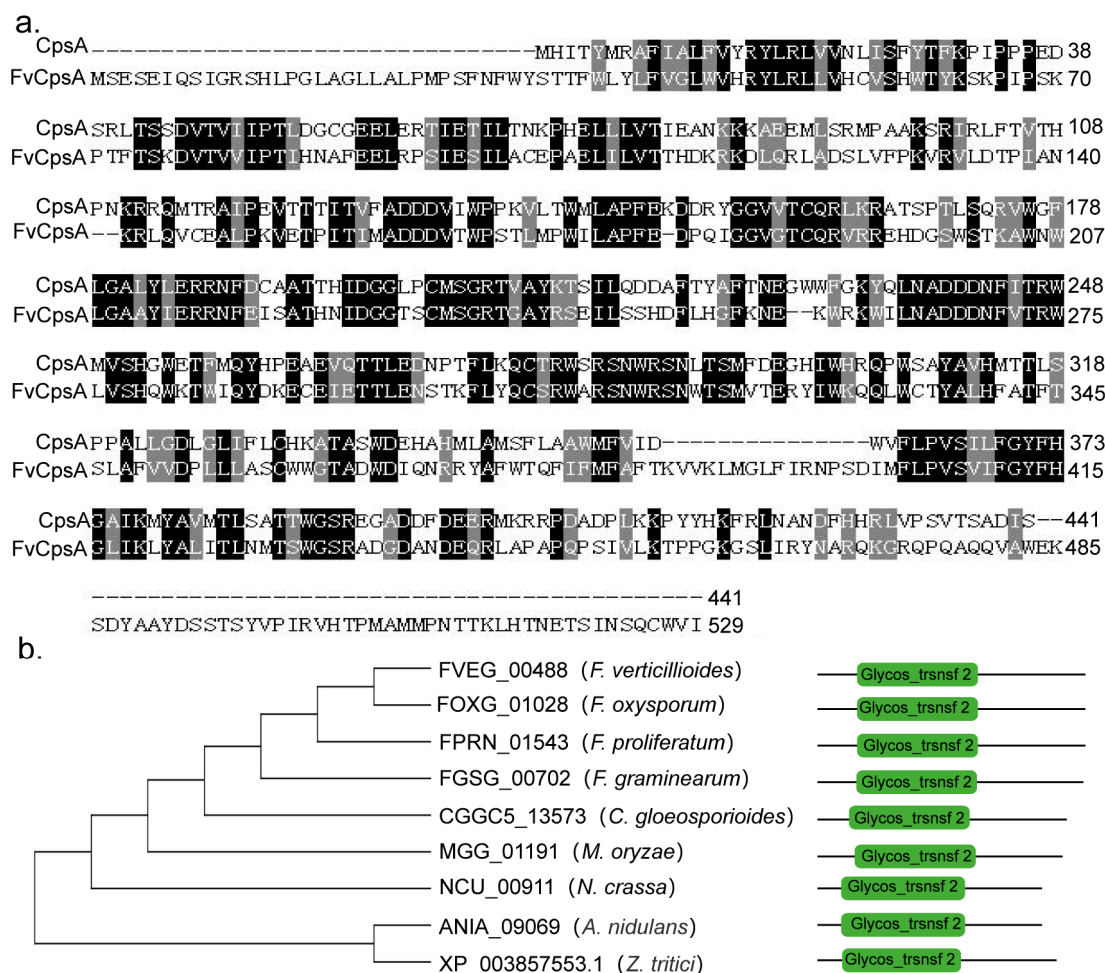

**Figure S1.** Identification of the family 2 glycosyltransferase proteins in *F. verticillioides*. (a) Amino acid alignment of FvCpsA and its ortholog CpsA in *A. nidulans*. (b) Phylogenetic relationship and domain analysis of family 2 glycosyltransferase. Phylogenetic tree was constructed by the neighbour-joining method with Mega 7 software based on the amino acid sequences from fungal species including *F. oxysporum*, *F. proliferatum*, *F. graminearum*, *C. gloeosporioides*, *M. oryzae*, *N. crassa*, *A. nidulans*, and *Z. tritici*. Conserved domains are indicated.

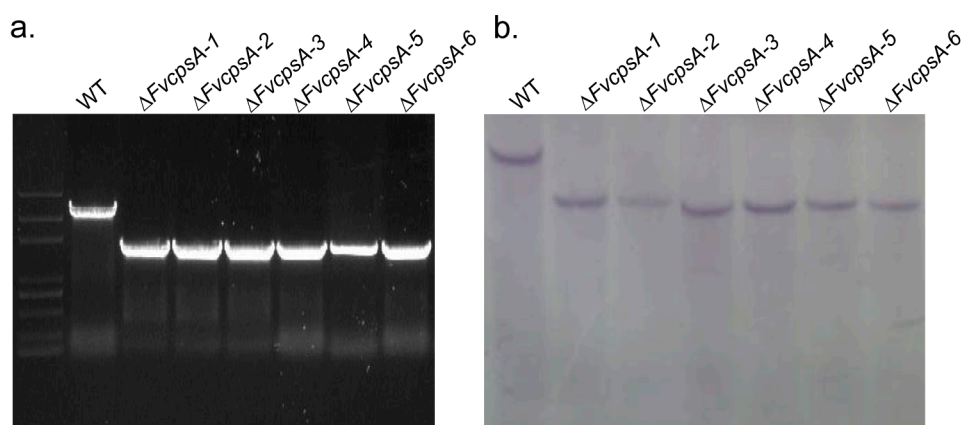

**Figure S2.** Construction and verification of  $\Delta FvcpsA$ . (a) PCR identification of the  $\Delta FvcpsA$ . (b) Southern blot analysis of the  $\Delta FvcpsA$ . The upstream fragment of *FvCPSA* was used as the probe.  $\Delta FvcpsA$  had an anticipated 4210 bp band, while 5808 bp band was presented in the wild type.

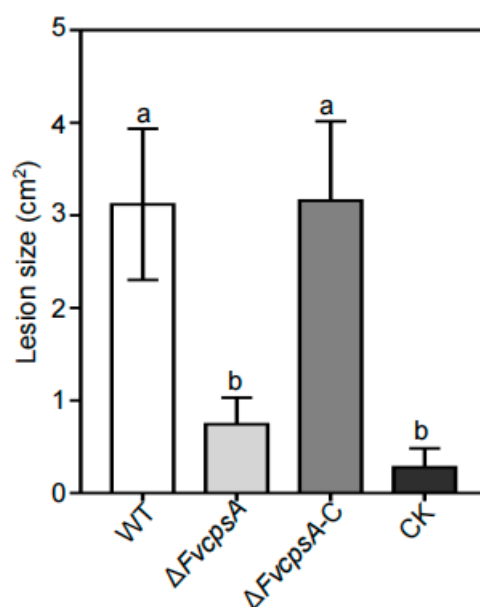

**Figure S3.** Statistical analysis of lesion area of longitudinally dissected maize stalk in Figure 5a. The letters a, b and c listed in the bars represent significant differences ( $P < 0.05$ ),  $N=6$ .

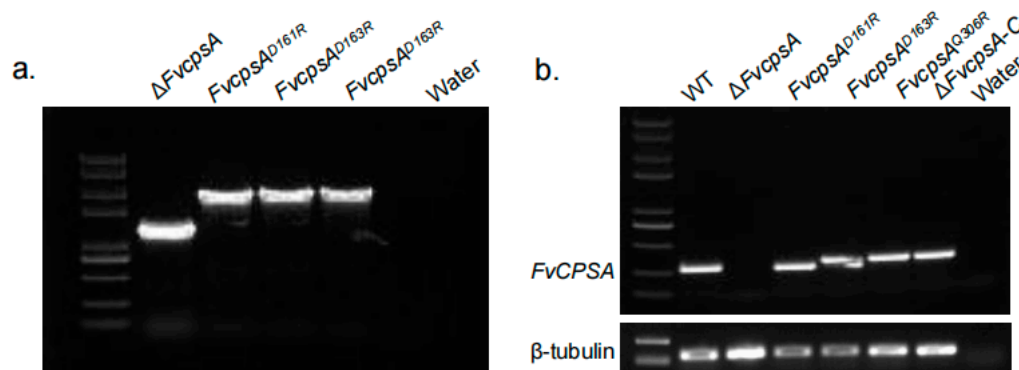

**Figure S4.** Identification of point mutant strains (a) PCR identification of the point mutants. (b) Semi-quantitative analysis of *FvCPSA* expression.  $\beta$ -tubulin was served as the control.

**Table S1.** A list of primers used in this study.

| Code | Name               | Sequence (5'to 3')                           | Products                                                                                                                       |
|------|--------------------|----------------------------------------------|--------------------------------------------------------------------------------------------------------------------------------|
| P1   | HYG-F              | CTTGCTGGAGCTAGTGGAGGT                        | A pair of PCR primers to amplify full Hygromycin B phosphotransferase gene fragments                                           |
| P2   | HYG-R              | CCCGGTCGGCATCTACTCTATTC                      |                                                                                                                                |
| P3   | FvCPSA-LBCK        | CCAGACAGGGACCTCGGATTT                        | Upstream fragment of <i>FvCPSA</i>                                                                                             |
| P4   | FvCPSA-LB-R        | ACCTCCACTAGCTCCAGCCAAGTAGTCGTGGTGGCACTGGTAGG |                                                                                                                                |
| P5   | FvCPSA-RB-F        | GAATAGAGTAGATGCCGACCGGGGGCGCAGACATTTTCATACC  | Downstream fragment of <i>FvCPSA</i>                                                                                           |
| P6   | FvCPSA-RBCK        | CCAGGGACCTGCATCCAATT                         |                                                                                                                                |
| P7   | FvCPSA-LB-F        | CGCTCAGTGGCCTTTGGTT                          | Partial hygromycin B phosphotransferase gene fuse with left flanking regions of <i>FvCPSA</i>                                  |
| P8   | HYG-R <sub>1</sub> | GGATGCCTCCGCTCGAAGTA                         |                                                                                                                                |
| P9   | HYG-F <sub>1</sub> | CGTTGCAAGACCTGCCTGAA                         | Partial hygromycin B phosphotransferase gene fuse with right flanking regions of <i>FvCPSA</i>                                 |
| P10  | FvCPSA-RB-R        | GCCCCGAGAAAGCTAGACA                          |                                                                                                                                |
| P11  | FvCPSA -ID-F       | CTCAAATCATCCAACCCCTCG                        | Identification of <i>FvCPSA</i> deletion transformants                                                                         |
| P12  | FvCPSA -ID-R       | ACTCTGTGTGTGGGTGGTGCTGT                      |                                                                                                                                |
| P13  | FV t-F             | TGCGATGCTGAATGGCTGTC                         | A pair of PCR primers to amplify probe fragments used for Southern blot                                                        |
| P14  | FV t-R             | TAGTCGTGGTGGCACTGGTAGG                       |                                                                                                                                |
| P15  | FvCPSA -com-F      | GGGAACAAAAGCTGGGTACCCTCCAAGTCAGGTTGTGCT      | A pair of PCR primers to amplify fragment used for construction of the <i>FvCPSA</i> complement, vector under its own promoter |
| P16  | FvCPSA-com-R       | GTAACGTTAAGTGCGGCCGCCAAACGATGCCATTTTAGG      |                                                                                                                                |
| P17  | UP-F1              | CGCTCAGTGGCCTTTGGTT                          | Upstream fragment of DXD/QXXRW motif                                                                                           |
| P18  | RXD-R1             | AGGTCACATCATCGCGCGCCAT                       |                                                                                                                                |
| P19  | DXR-R1             | CCAGGTCACGCGATCGTCCGCC                       |                                                                                                                                |
| P20  | RXXRW-R1           | AACGAGAGCAGCGATACAAAA                        |                                                                                                                                |
| P21  | RXD-F2             | ATGGCGCGCGATGATGTGACCT                       | Downstream fragment of DXD/QXXRW motif                                                                                         |
| P22  | DXR-F2             | GGCGGACGATCGCGTGACCTGG                       |                                                                                                                                |
| P23  | RXXRW-F2           | TTTTGTATCGCTGCTCTCGTT                        |                                                                                                                                |

|     |                    |                                               |                                                                  |
|-----|--------------------|-----------------------------------------------|------------------------------------------------------------------|
| P24 | up-R2              | GCATTGATGTGTTGACCTCCGTTAT<br>ACCCGCCTCAGAAGT  |                                                                  |
| P25 | Trpc-neo-F         | GGAGGTCAACACATCAATGCT                         | A pair of PCR primers to amplify full<br>G418 fragments          |
| P26 | Trpc-neo-R         | TCAGAAGAAGCTCGTCAAGAAG                        |                                                                  |
| P27 | Down-F3            | TTCTTGACGAGTTCTTCTGA<br>GGGCGCAGACATTTTCATACC | Downstream fragment of <i>FvcpsA</i>                             |
| P28 | Down-R3            | GGCCCGCAGAAAGCTAGACA                          |                                                                  |
| P29 | UP-F4              | ATGTTGCAGATTGATGAGTCC                         | A pair of PCR primers to fuse all<br>fragments of point mutation |
| P30 | Down-R4            | CCGCGTCAGAATCCATATCAT                         |                                                                  |
| P31 | ID-pm-R            | CGAGTGTAACACGTCAGCCCTAA<br>T                  | Identification of point mutation<br>transformants                |
| P32 | ID-pm-F            | GCAATGAACCAGAGCCAAAGC                         |                                                                  |
| P33 | $\beta$ -tubulin-F | GCTCTTCCGTCCTCCGACAACCT                       | qRT-PCR primers of <i>ACTIN</i>                                  |
| P34 | $\beta$ -tubulin-R | CAATCGCAGCCCTCAGCCTCA                         |                                                                  |
| P35 | FvcpsA-F           | ATTAGCACTGCCAATGCCTTCTTTC                     | qRT-PCR primers of <i>FvcpsA</i>                                 |
| P36 | FvcpsA-R           | CCTTACTCGTGAATGTGGTTTGCT                      |                                                                  |
| P37 | FUM1-F             | TGCTGCCCTGTATCACAACCA                         | qRT-PCR primers of <i>FUM1</i>                                   |
| P38 | FUM1-R             | AATGTGCGCTTGATCCAGTT                          |                                                                  |
| P39 | FUM2-F             | AAGTGCTCGGGGAGCGGGTT                          | qRT-PCR primers of <i>FUM2</i>                                   |
| P40 | FUM2-R             | TCGGGGCATAACTCTATATCG                         |                                                                  |
| P41 | FUM3-F             | ACTGATTTACCCGAGGCCAA                          | qRT-PCR primers of <i>FUM3</i>                                   |
| P42 | FUM3-R             | AGCGGACCGGAAGCTTCT                            |                                                                  |
| P43 | FUM6-F             | TCTCTTGTTCTTTGGCTGTCC                         | qRT-PCR primers of <i>FUM6</i>                                   |
| P44 | FUM6-R             | TCAATTTCTAGCAGCATCGG                          |                                                                  |
| P45 | FUM7-F             | GCATGGAGAGACAAGTTGCA                          | qRT-PCR primers of <i>FUM7</i>                                   |
| P46 | FUM7-R             | TCTGATGAACTGGGCTTCGT                          |                                                                  |
| P47 | FUM8-F             | GCGCTTGAGAGACGACTGGCC                         | qRT-PCR primers of <i>FUM8</i>                                   |
| P48 | FUM8-R             | GGTTGGCGCATGCACTGAGC                          |                                                                  |
| P49 | FUM10-F            | TTTGGAACCCAATGGCGAT                           | qRT-PCR primers of <i>FUM10</i>                                  |
| P50 | FUM10-R            | TTTCGGCAGGGCTGATTTTT                          |                                                                  |
| P51 | FUM11-F            | AAGGGGGGAAGATAGGCACT                          | qRT-PCR primers of <i>FUM11</i>                                  |
| P52 | FUM11-R            | ATTACGAGTCTTAGCGAGCG                          |                                                                  |
| P53 | FUM13-F            | AAACCATGGGATGGTATCAGG                         | qRT-PCR primers of <i>FUM13</i>                                  |
| P54 | FUM13-R            | TTTCTGCTGAGCCGACATCAT                         |                                                                  |
| P55 | FUM14-F            | AAGAGGTGCTAAAGACAGCCA                         | qRT-PCR primers of <i>FUM14</i>                                  |
| P56 | FUM14-R            | ACTCAGGAGCTGCGACTGATA                         |                                                                  |
